# Supplementary material
Source: PubMed Central journal article supplement (PMC8433509)
Supplement: pnas.2024943118.sapp.pdf [file pnas.2024943118.sapp.pdf]

# PNAS

[www.pnas.org](http://www.pnas.org)

1  
2  
3  
4  
5  
6  
7  
8  
9  
10  
11  
12  
13  
14  
15  
16  
17  
18  
19  
20  
21  
22  
23  
24  
25  
26

**Supplementary Information for:**

Hearing sensitivity: An underlying mechanism for niche differentiation in gleaning bats

**Authors:**

Inga Geipel<sup>1</sup>, Ella Z. Lattenkamp<sup>1</sup>, M. May Dixon, Lutz Wiegrebe and Rachel A. Page

<sup>1</sup>Joint first authors

**Corresponding author:**

Inga Geipel, [inga.geipel@gmail.com](mailto:inga.geipel@gmail.com)

27 **Table S1: Summary of recorded ABR measurements and audio sequences.** The number of individuals (n) recorded per species for two different  
 28 sound stimuli (tone pips and clicks), on either a logarithmic or linear scale and the number of individuals (n) for which their echolocation calls  
 29 where recorded are shown below.

| Species                           | ABR measurements          |          |            |                       |                           |                      |                    |                    |        | Echolocation call recordings |          |            |                       |
|-----------------------------------|---------------------------|----------|------------|-----------------------|---------------------------|----------------------|--------------------|--------------------|--------|------------------------------|----------|------------|-----------------------|
|                                   | Abbreviation of ABR files | Male (n) | Female (n) | Total per species (n) | Logarithmic 5-120 kHz (n) | Linear 5-117 kHz (n) | Linear 3-6 kHz (n) | Linear 0-5 kHz (n) | Clicks | Abbreviation of audio files  | Male (n) | Female (n) | Total per species (n) |
| <i>Gardnerycteris crenulatum</i>  | gd1-gd3                   | 1        | 0          | 1                     | 1                         | 1                    | 1                  | 1                  | 1      | Gd_01                        | 1        | 0          | 1                     |
| <i>Glyphonycteris daviesi</i>     | lb10+lb11                 | 1        | 0          | 1                     | 1                         | 1                    | 1                  | 1                  | 1      | Lamp_02                      | 0        | 1          | 1                     |
| <i>Lamproncycteris brachyotis</i> | lz1+bz1                   | 0        | 1          | 1                     | 1                         | 1                    | 1                  | 1                  | 1      | LophoS_01                    | 1        | 0          | 1                     |
| <i>Lophostoma brasiliense</i>     | ls1-ls15                  | 1        | 0          | 1                     | 1                         | 1                    | 1                  | 1                  | 1      | Ls_01-Ls_05                  | 4        | 1          | 5                     |
| <i>Lophostoma silvicolum</i>      | mama1-mama2               | 5        | 1          | 6                     | 6                         | 5                    | 5                  | 4                  | 6      | Mama_01                      | 1        | 0          | 1                     |
| <i>Macrophyllum macrophyllum</i>  | mh1-mh10                  | 1        | 0          | 1                     | 1                         | 1                    | 1                  | 1                  | 1      | Mh_01-Mh_05                  | 2        | 3          | 5                     |
| <i>Micronycteris hirsuta</i>      | mimi1-mimi14              | 2        | 3          | 5                     | 5                         | 4                    | 5                  | 0                  | 5      | Mimi_01-Mimi_07              | 5        | 2          | 7                     |
| <i>Micronycteris microtis</i>     | ms1-ms4                   | 5        | 2          | 7                     | 7                         | 7                    | 7                  | 1                  | 7      | Micsch_01                    | 1        | 0          | 1                     |
| <i>Micronycteris schmidtorum</i>  | mc+mc2                    | 1        | 0          | 1                     | 1                         | 1                    | 1                  | 1                  | 1      | Mc_01                        | 1        | 0          | 1                     |
| <i>Tonatia saurophila</i>         | ts1+ts2                   | 1        | 0          | 1                     | 1                         | 1                    | 1                  | 1                  | 1      | Ts_01                        | 1        | 0          | 1                     |
| <i>Trachops cirrhosus</i>         | tc3-tc6, cp7, tc8-tc16    | 5        | 3          | 8                     | 8                         | 6                    | 6                  | 2                  | 8      | Tc_01-Tc_07                  | 4        | 3          | 7                     |
| <i>Trinycteris nicefori</i>       | lb1-lb9                   | 4        | 0          | 4                     | 4                         | 4                    | 3                  | 0                  | 4      | Lb_01, Lb_02, Tn_03          | 3        | 0          | 3                     |

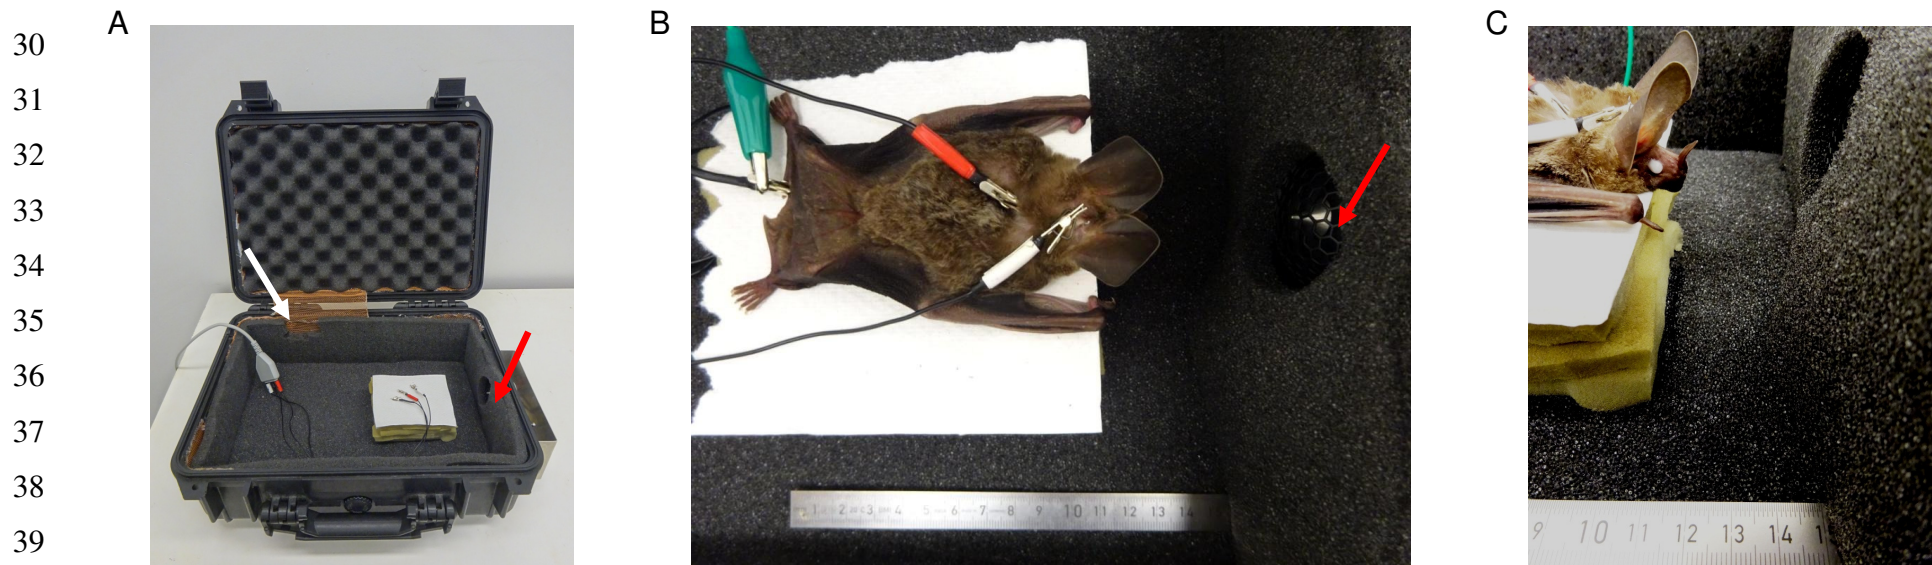

40 **Fig. S1: ABR setup and positioning of the individuals.** A) Photo of the open small sound-attenuating box, which was electrically insulated with a  
 41 layer of copper mesh (see part of the mesh between lid and box, indicated by white arrow) and acoustically insulated with sound-attenuation foam.  
 42 The loudspeaker was embedded in the right side of the box (indicated by red arrow). Small, soft foam pads were positioned in front of the  
 43 loudspeaker to support the individual and covered with paper towels for hygienic reasons. B) Each individual was carefully positioned facing the  
 44 center of the speaker (indicated by red arrow) with a 4 cm distance between its outer ear openings and the speaker. To adjust for the different sizes  
 45 of the individuals, the small, soft, thin foam pads were stacked at different heights. The heads of the bats were always placed at the same level as the  
 46 center of the speaker. We very diligently checked the head positioning to avoid an off-center angle towards the speaker. The recording electrode  
 47 (red, plus) was placed at the caudal midline of the head, close to the brainstem and the reference electrode (white, minus) was placed at the dorsal  
 48 midline of the head between the ears. The ground electrode (black) was placed on the tail membrane, carefully avoiding the calcar. To ground the  
 49 bat, the ground electrode was connected to the copper mesh of the setup via a crocodile clamp (green). C) Side view: To prevent the bats' eyes from  
 50 drying, a drop of eye cream was applied. *Lophostoma silvicolum* is shown as an example.

51 **Table S2: Administered amounts of Fentanyl and anesthesia durations.** For all measured species we show the body weight, amount of injected  
52 Fentanyl and duration of the anesthesia (given in min), i.e. time from the first injection until we observed the bat waking up or hanging from the side  
53 of the soft mesh cages the bats were placed in to fully recover from the anesthesia. Values represent the mean  $\pm$  standard deviation (SD) for the total  
54 number of individuals. For the mean  $\pm$  SD of the anesthesia duration, the number of individuals differs from the total number of individuals  
55 measured, as several individuals were used in an additional experiment and wakeup times for these individuals were not noted. The sample size (n)  
56 of the individuals for which anesthesia duration is known is given after the values, in parentheses.

| Species                          | Total number of individuals per species (n) | Weight [g]     | Fentanyl injected [ $\mu$ g per g body weight] | Anesthesia duration [min] (n) |
|----------------------------------|---------------------------------------------|----------------|------------------------------------------------|-------------------------------|
| <i>Gardnerycteris crenulatum</i> | 1                                           | 15.1           | 0.017                                          | 376                           |
| <i>Glyphonycteris daviesi</i>    | 1                                           | 23.6           | 0.014                                          | 259                           |
| <i>Lampronycteris brachyotis</i> | 1                                           | 11.5           | 0.017                                          | 249                           |
| <i>Lophostoma brasiliense</i>    | 1                                           | 8.1            | 0.012                                          |                               |
| <i>Lophostoma silvicolum</i>     | 6                                           | 27.5 $\pm$ 2.7 | 0.013 $\pm$ 0.003                              | 295 $\pm$ 81 (4)              |
| <i>Macrophyllum macrophyllum</i> | 1                                           | 9.4            | 0.013                                          | 141                           |
| <i>Micronycteris hirsuta</i>     | 5                                           | 16.1 $\pm$ 4.4 | 0.013 $\pm$ 0.006                              | 188 $\pm$ 54 (4)              |
| <i>Micronycteris microtis</i>    | 7                                           | 5.7 $\pm$ 0.3  | 0.014 $\pm$ 0.002                              | 174 $\pm$ 19 (6)              |
| <i>Micronycteris schmidtorum</i> | 1                                           | 7.9            | 0.027                                          | 380                           |
| <i>Tonatia saurophila</i>        | 1                                           | 32.6           | 0.01                                           | 241                           |
| <i>Trachops cirrhosus</i>        | 8                                           | 33.7 $\pm$ 4.4 | 0.016 $\pm$ 0.005                              | 248 $\pm$ 71 (5)              |
| <i>Trinycteris nicefori</i>      | 4                                           | 9.2 $\pm$ 0.8  | 0.017 $\pm$ 0.002                              | 276 $\pm$ 189                 |

57 **Table S3: Echolocation call parameter for 12 animalivorous gleaning bat species of the Neotropical leaf-nosed bat family (Phyllostomidae)**  
 58 **from Gamboa, Panamá.** Values are given as mean  $\pm$  standard deviation, for species with more than one individual ( $n > 1$ ) as the mean of the  
 59 means.

| Species                          | Individuals (calls) | Call duration [ms] | Peak frequency [kHz] | Bandwidth [kHz] | Min frequency [kHz] | Max frequency [kHz] | Sweep rate [kHz/ms] | Entropy           |
|----------------------------------|---------------------|--------------------|----------------------|-----------------|---------------------|---------------------|---------------------|-------------------|
| <i>Gardnerycteris crenulatum</i> | 1 (50)              | 0.69 $\pm$ 0.20    | 71.1 $\pm$ 4.1       | 32.7 $\pm$ 4.8  | 63.2 $\pm$ 3.4      | 95.9 $\pm$ 4.8      | 47.6                | 0.293 $\pm$ 0.028 |
| <i>Glyphonycteris daviesi</i>    | 1 (50)              | 0.55 $\pm$ 0.11    | 68.1 $\pm$ 4.8       | 36.2 $\pm$ 8.2  | 45.3 $\pm$ 4.9      | 81.5 $\pm$ 4.2      | 66.1                | 0.309 $\pm$ 0.041 |
| <i>Lampronycteris brachyotis</i> | 1 (50)              | 0.62 $\pm$ 0.21    | 88.1 $\pm$ 8.4       | 51.5 $\pm$ 13.9 | 68.9 $\pm$ 5.3      | 120.4 $\pm$ 12.5    | 82.5                | 0.367 $\pm$ 0.044 |
| <i>Lophostoma brasiliense</i>    | 1 (50)              | 0.64 $\pm$ 0.10    | 69.1 $\pm$ 10.5      | 73.8 $\pm$ 12.2 | 58.2 $\pm$ 1.1      | 132.1 $\pm$ 12.4    | 115.5               | 0.398 $\pm$ 0.052 |
| <i>Lophostoma silvicolum</i>     | 5 (250)             | 0.76 $\pm$ 0.08    | 73.7 $\pm$ 3.2       | 43.4 $\pm$ 3.4  | 56.4 $\pm$ 1.9      | 99.8 $\pm$ 2.2      | 57.0                | 0.336 $\pm$ 0.009 |
| <i>Macrophyllum macrophyllum</i> | 1 (50)              | 0.86 $\pm$ 0.14    | 77.2 $\pm$ 4.4       | 54.1 $\pm$ 15.8 | 53.8 $\pm$ 7.8      | 107.9 $\pm$ 14.3    | 63.0                | 0.329 $\pm$ 0.042 |
| <i>Micronycteris hirsuta</i>     | 5 (250)             | 0.59 $\pm$ 0.03    | 80.4 $\pm$ 3.7       | 60.2 $\pm$ 3.4  | 55.9 $\pm$ 2.5      | 116.2 $\pm$ 3.4     | 101.6               | 0.390 $\pm$ 0.021 |
| <i>Micronycteris microtis</i>    | 7 (350)             | 0.57 $\pm$ 0.04    | 97.6 $\pm$ 5.0       | 76.1 $\pm$ 5.6  | 60.3 $\pm$ 1.8      | 136.4 $\pm$ 5.0     | 132.6               | 0.430 $\pm$ 0.021 |
| <i>Micronycteris schmidtorum</i> | 1 (50)              | 0.64 $\pm$ 0.17    | 95.5 $\pm$ 16.9      | 78.5 $\pm$ 12.2 | 57.7 $\pm$ 6.7      | 136.3 $\pm$ 10.5    | 123.0               | 0.466 $\pm$ 0.041 |
| <i>Tonatia saurophila</i>        | 1 (50)              | 0.69 $\pm$ 0.16    | 71.1 $\pm$ 8.9       | 64.3 $\pm$ 15.4 | 34.9 $\pm$ 10.4     | 99.2 $\pm$ 9.4      | 92.6                | 0.391 $\pm$ 0.045 |
| <i>Trachops cirrhosus</i>        | 7 (350)             | 0.58 $\pm$ 0.05    | 69.6 $\pm$ 3.4       | 54.8 $\pm$ 3.5  | 51.5 $\pm$ 1.7      | 106.4 $\pm$ 3.6     | 94.5                | 0.394 $\pm$ 0.013 |
| <i>Trinycteris nicefori</i>      | 3 (150)             | 0.69 $\pm$ 0.10    | 72.7 $\pm$ 7.7       | 43.3 $\pm$ 3.6  | 56.0 $\pm$ 6.7      | 99.4 $\pm$ 7.5      | 62.7                | 0.325 $\pm$ 0.016 |

61 **Table S4: Comparative hearing thresholds of 12 gleaning bat species.** Presented are the detected ABR thresholds (lowest sound levels (in dB  
62 peSPL) evoking a significant ABR signal) for all tested species measured in response to 29 tone pip frequencies. For species for which more than  
63 one individual was measured, the mean threshold is given and the lowest and highest measured threshold are highlighted (in green and yellow,  
64 respectively). This data is also presented in Fig. 2 of the main text.  
65

| Frequency<br>[in kHz] | <i>M.<br/>microtis</i> | <i>T.<br/>nicefori</i> | <i>M.<br/>hirsuta</i> | <i>L.<br/>silvicolum</i> | <i>T.<br/>cirrhosus</i> | <i>L.<br/>brasiliense</i> | <i>L.<br/>brachyotis</i> | <i>T.<br/>saurophila</i> | <i>G.<br/>daviesi</i> | <i>G.<br/>crenulatum</i> | <i>M.<br/>macrophyllum</i> | <i>M.<br/>schmidtorum</i> |
|-----------------------|------------------------|------------------------|-----------------------|--------------------------|-------------------------|---------------------------|--------------------------|--------------------------|-----------------------|--------------------------|----------------------------|---------------------------|
| N                     | 7                      | 4                      | 4                     | 5                        | 6                       | 1                         | 1                        | 1                        | 1                     | 1                        | 1                          | 1                         |
| 5                     | 75                     | 88                     | 79                    | 56                       | 49                      | 64                        | 82                       | 46                       | 64                    | 64                       | 88                         | 94                        |
| 9                     | 51                     | 70                     | 38                    | 34                       | 42                      | 40                        | 46                       | 34                       | NaN                   | 46                       | 70                         | 46                        |
| 13                    | 37                     | 54                     | 39                    | 34                       | 40                      | 40                        | 40                       | 34                       | NaN                   | 40                       | 46                         | 28                        |
| 17                    | 38                     | 51                     | 42                    | 34                       | 38                      | 40                        | 34                       | 40                       | 34                    | 34                       | 34                         | 34                        |
| 21                    | 36                     | 48                     | 40                    | 36                       | 36                      | 34                        | 34                       | 40                       | 34                    | 34                       | NaN                        | 40                        |
| 25                    | 36                     | 50                     | 40                    | 34                       | 36                      | 34                        | 34                       | 28                       | 34                    | 40                       | 40                         | 34                        |
| 29                    | 37                     | 49                     | 39                    | 34                       | 39                      | 40                        | 34                       | 40                       | NaN                   | 34                       | 34                         | 34                        |
| 33                    | 38                     | 46                     | 37                    | 37                       | 38                      | 52                        | 40                       | 34                       | 34                    | 40                       | 40                         | 34                        |
| 37                    | 38                     | 48                     | 39                    | 35                       | 40                      | 64                        | 40                       | 34                       | 34                    | 40                       | 40                         | 52                        |
| 41                    | 39                     | 52                     | 43                    | 38                       | 38                      | 76                        | 40                       | 34                       | 34                    | 52                       | 40                         | 34                        |
| 45                    | 42                     | 49                     | 43                    | 37                       | 39                      | 64                        | 40                       | 34                       | 40                    | 46                       | 40                         | 40                        |
| 49                    | 43                     | 60                     | 49                    | 46                       | 47                      | 64                        | 52                       | 40                       | 46                    | 40                       | 52                         | 46                        |
| 53                    | 44                     | 57                     | 49                    | 50                       | 47                      | 64                        | 52                       | 40                       | 46                    | 52                       | 52                         | 64                        |
| 57                    | 43                     | 69                     | 49                    | 46                       | 41                      | 76                        | 52                       | 40                       | 46                    | 52                       | 52                         | 46                        |
| 61                    | 47                     | 64                     | 54                    | 50                       | 42                      | 76                        | 58                       | 40                       | 46                    | 58                       | 52                         | 52                        |
| 65                    | 47                     | 64                     | 58                    | 53                       | 40                      | 82                        | 52                       | 40                       | 46                    | 52                       | 58                         | 58                        |

| Frequency<br>[in kHz] | <i>M.<br/>microtis</i> | <i>T.<br/>nicefori</i> | <i>M.<br/>hirsuta</i> | <i>L.<br/>silvicolum</i> | <i>T.<br/>cirrhosus</i> | <i>L.<br/>brasiliense</i> | <i>L.<br/>brachyotis</i> | <i>T.<br/>saurophila</i> | <i>G.<br/>daviesi</i> | <i>G.<br/>crenulatum</i> | <i>M.<br/>macrophyllum</i> | <i>M.<br/>schmidtorum</i> |
|-----------------------|------------------------|------------------------|-----------------------|--------------------------|-------------------------|---------------------------|--------------------------|--------------------------|-----------------------|--------------------------|----------------------------|---------------------------|
| 69                    | <b>46</b>              | <b>70</b>              | 61                    | 56                       | 48                      | 82                        | 70                       | 46                       | 46                    | 64                       | 64                         | 46                        |
| 73                    | <b>45</b>              | <b>70</b>              | 55                    | 60                       | 57                      | 82                        | 76                       | 52                       | 64                    | 70                       | 64                         | 52                        |
| 77                    | <b>47</b>              | <b>72</b>              | 61                    | 64                       | 57                      | 88                        | 82                       | 52                       | 64                    | 76                       | 70                         | 58                        |
| 81                    | <b>49</b>              | <b>73</b>              | 66                    | 65                       | 60                      | 88                        | 76                       | 52                       | 76                    | 82                       | 76                         | 64                        |
| 85                    | <b>53</b>              | <b>82</b>              | 67                    | 69                       | 58                      | 94                        | 82                       | 52                       | 76                    | 82                       | 70                         | 64                        |
| 89                    | <b>55</b>              | <b>79</b>              | 67                    | 75                       | 65                      | 88                        | 94                       | 64                       | 70                    | 94                       | 76                         | 64                        |
| 93                    | <b>60</b>              | <b>84</b>              | 67                    | 77                       | 70                      | 88                        | 94                       | 70                       | 82                    | 100                      | 76                         | 64                        |
| 97                    | <b>62</b>              | <b>85</b>              | 72                    | 76                       | 78                      | 94                        | 94                       | 76                       | 94                    | 100                      | 76                         | 70                        |
| 101                   | <b>66</b>              | <b>88</b>              | 75                    | 87                       | 81                      | 88                        | 94                       | 76                       | 94                    | NaN                      | 76                         | 70                        |
| 105                   | <b>71</b>              | <b>88</b>              | 73                    | 87                       | 85                      | 94                        | 88                       | 76                       | 88                    | 94                       | 82                         | 76                        |
| 109                   | <b>77</b>              | 91                     | 79                    | <b>93</b>                | 92                      | 88                        | 94                       | 76                       | 100                   | 100                      | 82                         | 82                        |
| 113                   | <b>79</b>              | 90                     | 85                    | 94                       | <b>95</b>               | 100                       | 88                       | 94                       | NaN                   | NaN                      | 82                         | 82                        |
| 117                   | <b>84</b>              | <b>100</b>             | 91                    | 97                       | 99                      | NaN                       | 94                       | 94                       | NaN                   | NaN                      | 82                         | 88                        |

66

67

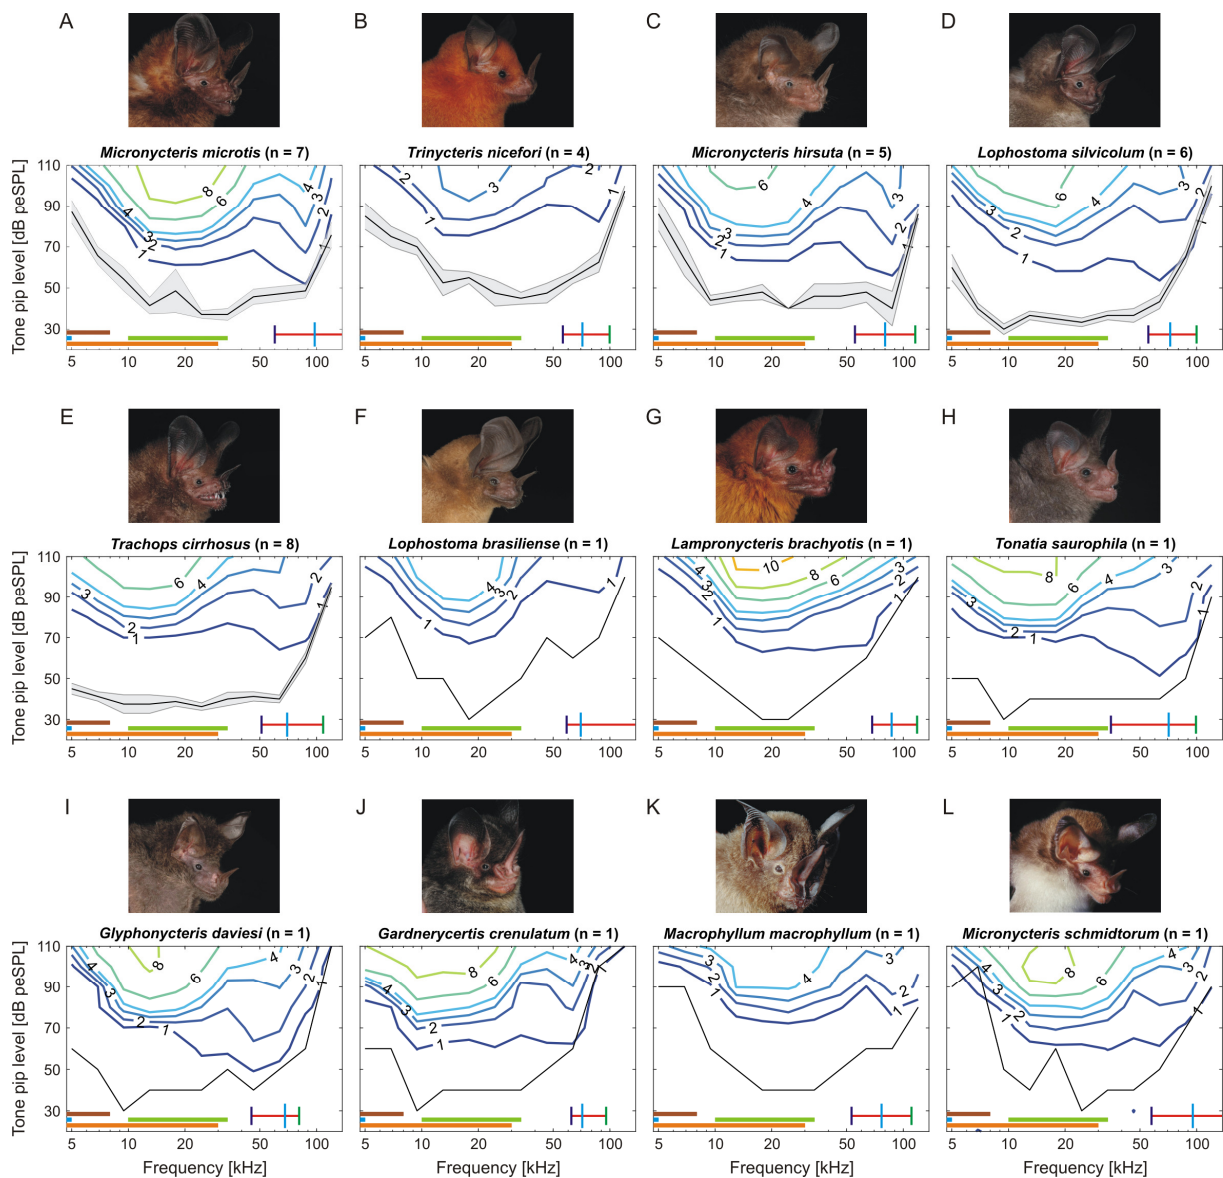

68  
69

70 **Fig. S2: Audiograms of 12 gleaner bat species.** Graphs depict species-specific (mean)  
 71 ABR thresholds (black lines; shading presents SEM for species with  $n \geq 4$ ), which were  
 72 calculated via bootstrap analyses. Measurements were conducted for 11 tone pip frequencies  
 73 logarithmically distributed between 5 and 120 kHz and sound levels between 0 and 110 dB  
 74 peSPL in 10-dB increments. The iso-response lines (colored lines) represent the different  
 75 strengths of the measured ABR signal (numbers indicate ABR strength in  $\mu\text{V}$ ). Species names  
 76 and the number of measured individuals ( $n$ ) are given in the respective plot title (A-L).  
 77 Audiograms for single individuals (F-L) should be interpreted with care due to the low sample  
 78 size ( $n = 1$ ). Horizontal bars represent different prey frequency ranges: 2 - 8 kHz (crickets;  
 79 brown), 0.4 - 5 kHz (frogs; light blue), 10 - 34 kHz (katydids; light green) and 3 - 30 kHz  
 80 (prey rustling sounds; orange). The red horizontal bar in the audiograms indicates the  
 81 recorded frequency bandwidth of the species-specific echolocation calls. Vertical bars



82 represent minimum frequency (dark blue), peak frequency (light blue), and maximum  
 83 frequency (green). For detailed echolocation call parameter measurements see SI Appendix  
 84 Table S4. Bat portraits here and in Fig. S3, Fig. S4 and Fig. S5 with courtesy of Marco  
 85 Tschapka.

86  
 87  
 88  
 89

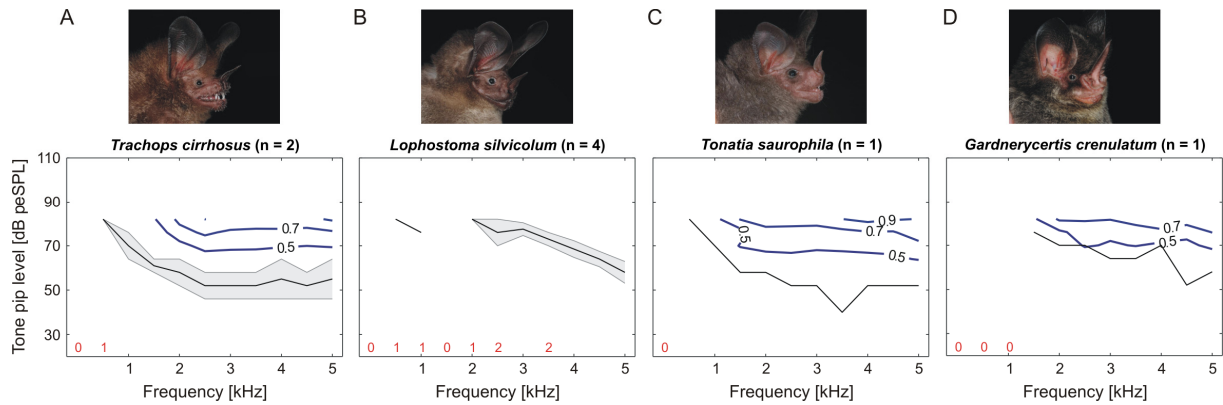

90  
 91

92 **Fig. S3: Audiograms of four gleaning bat species with measurable ABR's below 5 kHz.**

93 Graphs depict species-specific (mean) ABR thresholds (black lines; shading presents SEM for  
 94 species with  $n \geq 2$ ), which were calculated via bootstrap analyses. Measurements were  
 95 conducted for 11 tone pip frequencies linearly distributed between distributed between 0 and  
 96 5 kHz and 10 sound levels between 28 and 82 dB peSPL. The iso-response lines (colored  
 97 lines) represent the different strengths of the measured ABR signal (numbers indicate ABR  
 98 strength in  $\mu\text{V}$ ). Species names and the number of measured individuals ( $n$ ) are given in the  
 99 respective plot title (A-D). The measurements should be considered with caution due to lack  
 100 of calibration of the speaker below 2 kHz. Aside from *T. cirrhosus* and *L. silvicolum* (Fig.  
 101 3D,E), we found low auditory thresholds in the low frequency range (3 - 6 kHz) for *Tonatia*  
 102 *saurophila* and *Gardnerycteris crenulatum* (Fig. 3H,J). For these four species we were also  
 103 able to detect hearing thresholds below 3 kHz. The other eight species showed only weak  
 104 responses to frequencies between 3 - 6 kHz (Fig. 3).

105

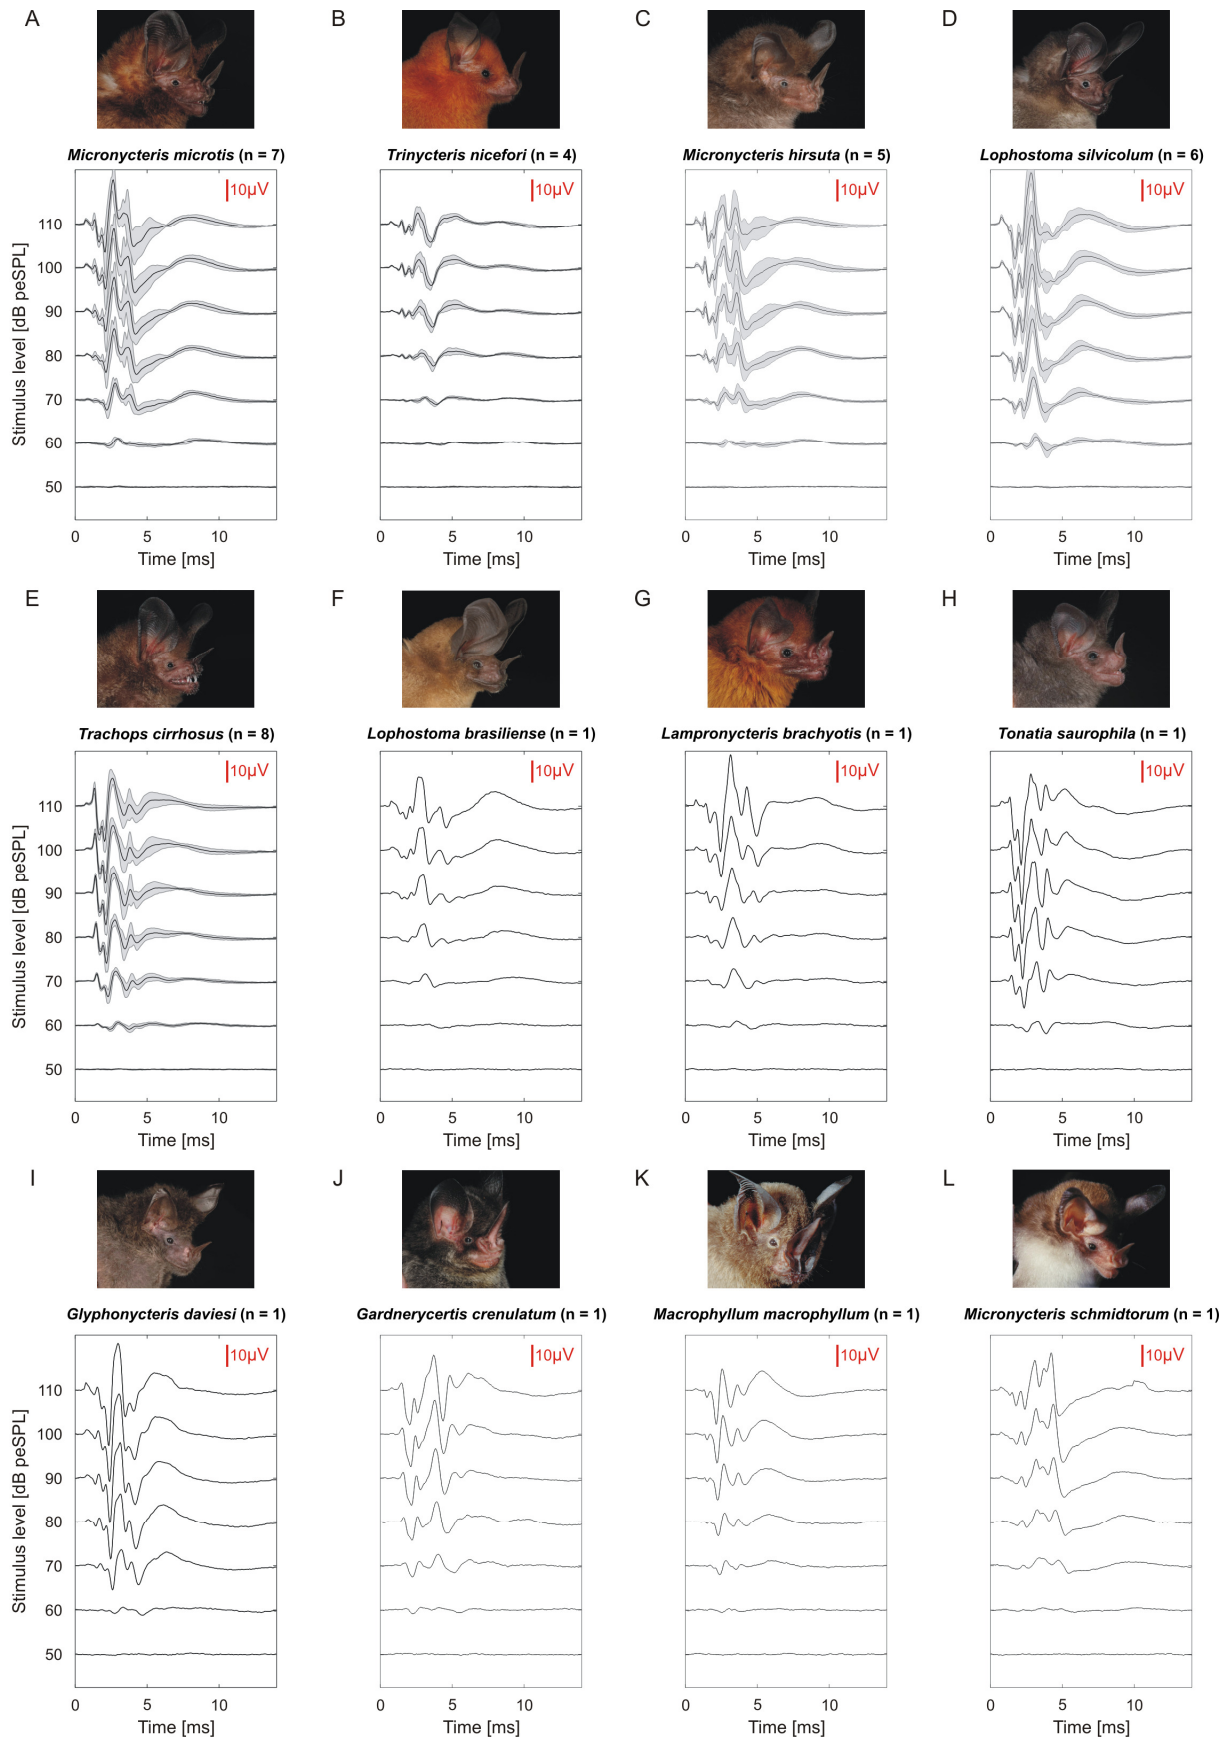

106  
107  
108  
109

**Fig. S4: Stimulus level dependent ABR waveforms of 12 gleaning bat species.** The panels show the (mean) click-evoked ABR waveform (solid black line) and SEM (shading, for

110 species with  $n > 1$ ). Displayed are ABRs recorded in response to broadband clicks (i.e.  
111 broadband impulses with a flat power spectrum between 3 and 120 kHz) presented at 50 to  
112 110 dB peSPL stimulus level. The species show species-specific characteristics in the location  
113 of the waveform extrema, which correspond to variation in the neuronal activity in the  
114 different processing centers along the auditory pathway.

115

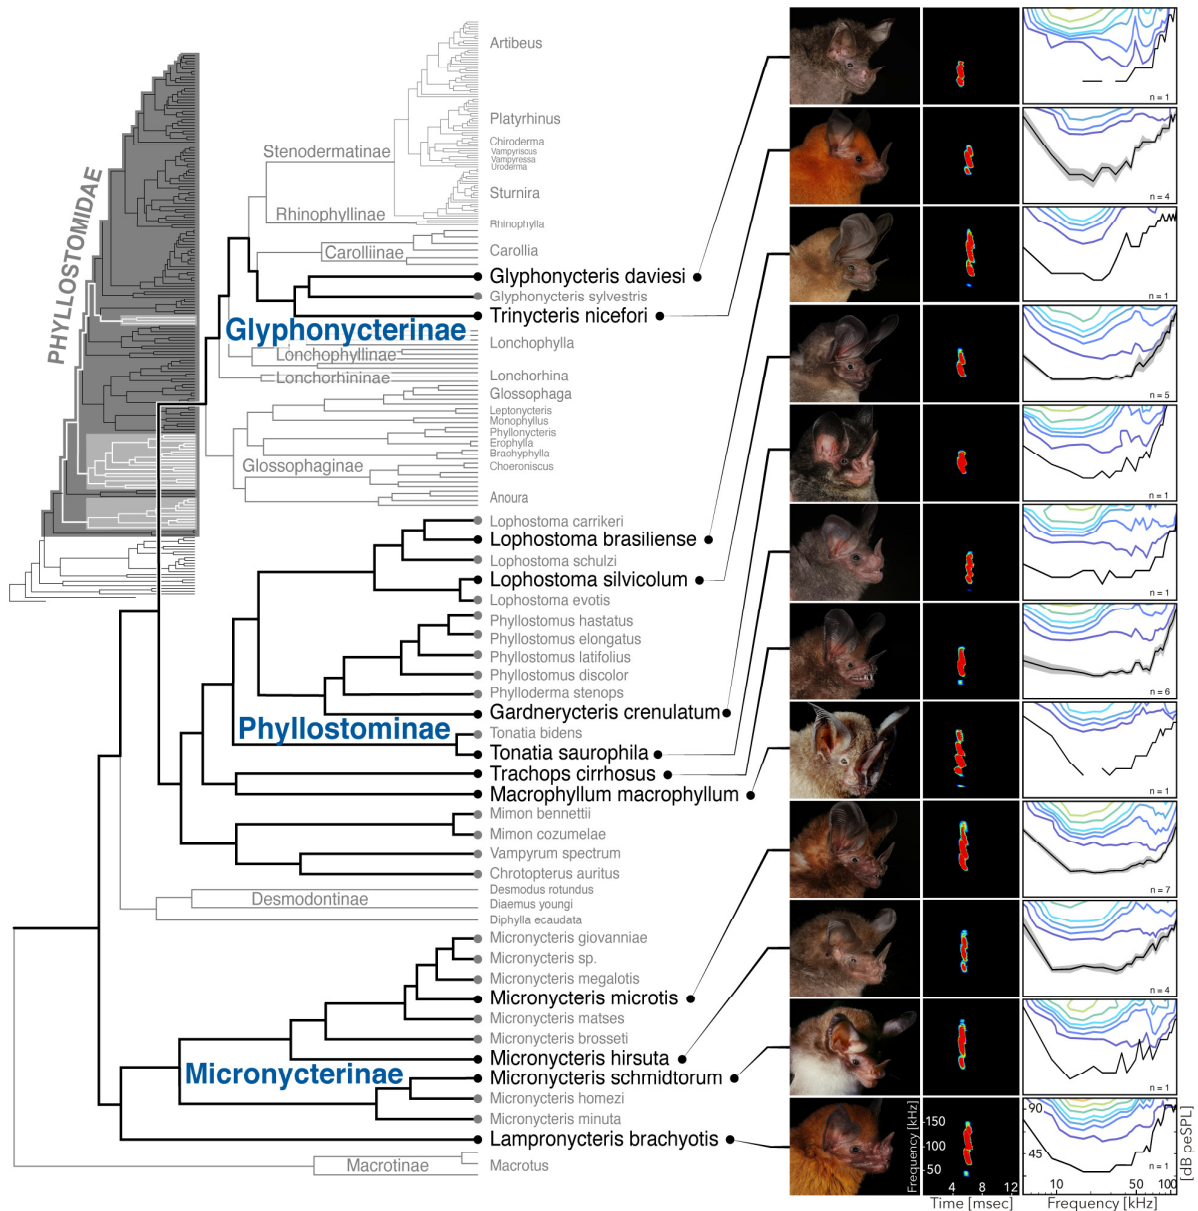

116

117 **Fig. S5: Phylogeny, echolocation calls and audiograms of 12 gleaning bat species in the**  
 118 **family Phyllostomidae.** Phylogeny redrawn from Rojas et al. (1) highlights the 12 gleaning  
 119 species included in our study. Adjacent to the bat portraits, spectrograms illustrate a  
 120 representative echolocation call for the respective studied species. Frequency and duration are  
 121 scaled for comparison. Calls were filtered with a noise reduction filter (see Methods).  
 122 Spectrogram parameters: FFT size 1024, FlatTop window, 96.43 % overlap; frequency  
 123 resolution: 488 Hz, temporal resolution: 0.064 ms. Furthest to the right, graphs depict species-  
 124 specific (mean) ABR thresholds (black lines; shading presents SEM for species with  $n \geq 3$ ),  
 125 which were calculated via bootstrap analyses. Measurements were conducted for 29 tone pip  
 126 frequencies linearly distributed between 5 and 117 kHz and 13 sound levels between 28 and

127 100 dB peSPL in 6-dB increments. The iso-response lines (colored lines) represent the  
128 different strengths of the measured ABR signal.

129

130

131 **References:**

132

133 1. D. Rojas, O. M. Warsi, L. M. Dávalos, Bats (Chiroptera: Noctilionoidea) challenge a recent  
134 origin of extant Neotropical diversity. *Syst. Biol.* **65**, 432-448 (2016).

135

136
